# Supplementary material for: Application and Comparison of Dermoscopy and Reflectance Confocal Microscopy in the Target Treatment of Genital Lichen Sclerosus: A Single-Arm Prospective Study
Source: Springer Nature journal article supplement (doi:10.1007/s13555-023-01039-2), 2023-10-15
Supplement: MOESM1 [file 26182746]

## Supplementary Material

**Title:** Application and Comparison of Multiple Dermatological Imaging Evaluation in the Target Treatment of Genital Lichen Sclerosus: A Single-Arm Prospective Study

**Running Title:** Baricitinib and skin image for GLS

ChengBei Bao, MM<sup>1,2,3#</sup>, Yan Zhao, MM<sup>1,2,3#</sup>, RenWei Luo, MM<sup>1,2,3#</sup>, Qiuyun Xu, MD<sup>1,2,3#</sup>, ZeQun Tong, MM<sup>1,2,3</sup>, Zhixun Xiao, MD<sup>1,2,3</sup>, Zheyu Zhuang, MM<sup>1,2,3</sup>, Wenjia Dai, BD<sup>4</sup>, Bohan Gu, BD<sup>5</sup>, Ting Gong, PhD<sup>1,6</sup>, Cheng Bo, PhD<sup>1,2,3\*</sup>, Chao Ji, PhD<sup>1,2,3\*</sup>

<sup>1</sup> Department of Dermatology, The First Affiliated Hospital of Fujian Medical University, Fuzhou, Fujian 350000, China

<sup>2</sup> Key Laboratory of Skin Cancer of Fujian Higher Education Institutions, the First Affiliated Hospital, Fujian Medical University, Fuzhou, Fujian 350000, China

<sup>3</sup> Fujian Dermatology and Venereology Research Institute, the First Affiliated Hospital, Fujian Medical University, Fuzhou, Fujian 350000, China

<sup>4</sup> Nanjing Medical University, Nanjing, Jiangsu 035599, China

<sup>5</sup> Soochow University, Suzhou, Jiangsu 215000, China

<sup>6</sup> Central Laboratory, the First Affiliated Hospital of Fujian Medical University, Fuzhou, Fujian 350000, China

[# These authors have contributed equally to this work.]

\*Correspondence:

Bo Cheng. Email: [chengbo630415@126.com](mailto:chengbo630415@126.com)

Chao Ji. Email: [jichaofy@fjmu.edu.cn](mailto:jichaofy@fjmu.edu.cn)

**Supplementary Table 1.** The Investigator's Global Assessment (IGA)

| Score | IGA score definition                                                                           |
|-------|------------------------------------------------------------------------------------------------|
| 0     | cleared no inflammatory signs.                                                                 |
| 1     | minimal disease: minimal erythema/whitening, infiltration, lichenification, and excoriation.   |
| 2     | mild disease: mild erythema/whitening, infiltration, lichenification, and excoriation.         |
| 3     | moderate disease: moderate erythema/whitening, infiltration, lichenification, and excoriation. |
| 4     | marked disease: marked erythema/whitening, infiltration, lichenification, and excoriation.     |
| 5     | severe disease: severe erythema/whitening, infiltration, lichenification, and excoriation.     |

**Supplementary Table 2.** Dermatology Life Quality Index

|    |                                                                                                                                         |                                              |                                                                                                              |                                       |
|----|-----------------------------------------------------------------------------------------------------------------------------------------|----------------------------------------------|--------------------------------------------------------------------------------------------------------------|---------------------------------------|
| 1. | Over the last week, how <b>itchy, sore, painful, or stinging</b> has your skin been?                                                    | Very much<br>A lot<br>A little<br>Not at all | <input type="checkbox"/><br><input type="checkbox"/><br><input type="checkbox"/><br><input type="checkbox"/> |                                       |
| 2. | Over the last week, how <b>embarrassed or self-conscious</b> have you been because of your skin?                                        | Very much<br>A lot<br>A little<br>Not at all | <input type="checkbox"/><br><input type="checkbox"/><br><input type="checkbox"/><br><input type="checkbox"/> |                                       |
| 3. | Over the last week, how much has your skin interfered with you going <b>shopping</b> or looking after your <b>home or yard</b> ?        | Very much<br>A lot<br>A little<br>Not at all | <input type="checkbox"/><br><input type="checkbox"/><br><input type="checkbox"/><br><input type="checkbox"/> | Not relevant <input type="checkbox"/> |
| 4. | Over the last week, how much has your skin influenced the <b>clothes</b> you wear?                                                      | Very much<br>A lot<br>A little<br>Not at all | <input type="checkbox"/><br><input type="checkbox"/><br><input type="checkbox"/><br><input type="checkbox"/> | Not relevant <input type="checkbox"/> |
| 5. | Over the last week, how much has your skin affected any <b>social or leisure</b> activities?                                            | Very much<br>A lot<br>A little<br>Not at all | <input type="checkbox"/><br><input type="checkbox"/><br><input type="checkbox"/><br><input type="checkbox"/> | Not relevant <input type="checkbox"/> |
| 6. | Over the last week, how much has your skin made it difficult for you to do any <b>sport</b> ?                                           | Very much<br>A lot<br>A little<br>Not at all | <input type="checkbox"/><br><input type="checkbox"/><br><input type="checkbox"/><br><input type="checkbox"/> | Not relevant <input type="checkbox"/> |
| 7. | Over the last week, has your skin prevented you from <b>working or studying</b> ?                                                       | yes<br>no                                    | <input type="checkbox"/><br><input type="checkbox"/>                                                         | Not relevant <input type="checkbox"/> |
|    | If "No", over the last week how much has your skin been a problem at <b>work or studying</b> ?                                          | A lot<br>A little<br>Not at all              | <input type="checkbox"/><br><input type="checkbox"/><br><input type="checkbox"/>                             |                                       |
| 8. | Over the last week, how much has your skin created problems with your <b>partner</b> or any of your <b>close friends or relatives</b> ? | Very much<br>A lot<br>A little<br>Not at all | <input type="checkbox"/><br><input type="checkbox"/><br><input type="checkbox"/><br><input type="checkbox"/> | Not relevant <input type="checkbox"/> |

|     |                                                                                                                                                     |                                              |                                                                                                              |                                                                                                              |                                       |
|-----|-----------------------------------------------------------------------------------------------------------------------------------------------------|----------------------------------------------|--------------------------------------------------------------------------------------------------------------|--------------------------------------------------------------------------------------------------------------|---------------------------------------|
| 9.  | Over the last week, how much has your skin caused any <b>sexual difficulties</b> ?                                                                  | Very much<br>A lot<br>A little<br>Not at all | <input type="checkbox"/><br><input type="checkbox"/><br><input type="checkbox"/><br><input type="checkbox"/> | <input type="checkbox"/><br><input type="checkbox"/><br><input type="checkbox"/><br><input type="checkbox"/> | Not relevant <input type="checkbox"/> |
| 10. | Over the last week, how much of a problem has the <b>treatment</b> for your skin been, for example by making your home messy, or by taking up time? | Very much<br>A lot<br>A little<br>Not at all | <input type="checkbox"/><br><input type="checkbox"/><br><input type="checkbox"/><br><input type="checkbox"/> | <input type="checkbox"/><br><input type="checkbox"/><br><input type="checkbox"/><br><input type="checkbox"/> | Not relevant <input type="checkbox"/> |

| Option                   | Score |
|--------------------------|-------|
| Very much                | 3     |
| A lot                    | 2     |
| A Little                 | 1     |
| Not at all/ Not relevant | 0     |

### Supplementary Table 3. Modified Vulvar Quality of Life Index

1. Over the past month how itchy and/or painful and/or stinging and/or burning has your genital skin felt?

- Very much
- A lot
- A Little
- Not at all

2. Over the past month, how often have you experienced any of the following: pain when urinating, heat intolerance?

- Very much
- A lot
- A Little
- Not at all

3. Over the last month how embarrassed or self-conscious have you been because of your genital skin symptoms?

- Very much
- A lot
- A Little
- Not at all

4. Over the past month how much has your vulvar skin impacted your body image or sense of self? (For instance, sense of femininity or masculinity, feeling isolated, feeling different)?

- Very much
- A lot
- A Little
- Not at all

5. Over the last month how distressed or anxious have you felt because of your genital skin problem?

- Very much
- A lot
- A Little
- Not at all

6. Over the last month how much has your genital skin problem influenced your choice of clothing (For instance underwear, jeans, gym clothes)?

- Very much
- A lot
- A Little
- Not at all

7. Over the last month how much has your genital skin problem disturbed your sleep?

- Very much
- A lot
- A Little
- Not at all

**8.** Over the last month how much has your genital skin problem made it difficult for you to go shopping, look after yourself or your family, home, and garden?

- Very much
- A lot
- A Little
- Not at all

**9.** Over the last month how much has your genital skin problem made it difficult for you to attend social or leisure engagements? (For instance, going out for dinner or bars, dating, sport, exercise class, gym)

- Very much
- A lot
- A Little
- Not at all

**10.** Over the last month how much has your genital skin problem interfered with your ability to concentrate on work or study?

- Very much
- A lot
- A Little
- Not at all / Not applicable

**11.** Over the last month how much has your genital skin problem created problems with a partner or precluded you from pursuing a romantic relationship? (For instance, maintaining a relationship or finding a partner)

- Very much
- A lot
- A Little
- Not at all / Not applicable

**12.** Over the last month how much has your genital skin problem interfered with your sex life? (For instance, decreased libido, decreased frequency of sex, pain with sex and/or enjoyment of sex)

- Very much
- A lot
- A Little
- Not at all /Not applicable

**13.** Over the last month how often have you felt distressed or worried about sex because of your genital skin?

- Very much
- A lot
- A Little
- Not at all / Not applicable

**14.** How often in the last month have you been worried about long-term health implications of your genital skin condition? (For instance, concern about developing cancer or difficulties with fertility)

- Very much
- A lot
- A Little
- Not at all

15. Over the past month, how much of a problem has the treatment of your genital symptoms been (For instance messy, time consuming, expensive, inconvenient)?

- Very much
- A lot
- A Little
- Not at all / Not applicable

| <b>Option</b>              | <b>Score</b> |
|----------------------------|--------------|
| Very much                  | 3            |
| A lot                      | 2            |
| A Little                   | 1            |
| Not at all/ Not applicable | 0            |

| <b>Overall VQLI Score Range</b> | <b>Impact on Quality of Life</b> |
|---------------------------------|----------------------------------|
| 0 to 5                          | minimal                          |
| 6 to 13                         | mild                             |
| 14 to 23                        | moderate                         |
| 24 to 37                        | severe                           |
| 38 to 45                        | very severe                      |

**Supplementary Table 4.** Demographic and clinical characteristics of the study cohort at baseline and week 24

| Sex | Age, years | Ethnicity | Disease duration       | Disease duration      | Follow-up, months | IGA (Week 0 /Week 24) | Symptoms score (Week 0 / Week 24) |      |                    |         |             | DLQI (Week 0 /Week 24) | VQLI (Week 0 /Week 24) | Inflammatory cells count under RCM* (Week 0 /Week 24) |
|-----|------------|-----------|------------------------|-----------------------|-------------------|-----------------------|-----------------------------------|------|--------------------|---------|-------------|------------------------|------------------------|-------------------------------------------------------|
|     |            |           | since diagnose, months | since symptom, months |                   |                       | Pruritus                          | Pain | Erectile tightness | Dysuria | Dyspareunia |                        |                        |                                                       |
| F   | 55         | Asian     | 64                     | 70                    | 8                 | 4/1                   | 5/0                               | 3/0  | -                  | 0 / 0   | 0 / 0       | 18/1                   | 24/1                   | 405/9                                                 |
| F   | 39         | Asian     | 40                     | 45                    | 8                 | 3/0                   | 4/0                               | 3/0  | -                  | 0 / 0   | 0 / 0       | 12/1                   | 20/1                   | 324/9                                                 |
| F   | 55         | Asian     | 52                     | 59                    | 8                 | 4/0                   | 4/0                               | 4/0  | -                  | 0 / 0   | 0 / 0       | 17/1                   | 25/1                   | 392/4                                                 |
| F   | 37         | Asian     | 12                     | 24                    | 8                 | 2/0                   | 3/0                               | 0/0  | -                  | 0 / 0   | 0 / 0       | 6/1                    | 13/1                   | 300/6                                                 |
| F   | 34         | Asian     | 15                     | 20                    | 8                 | 2/0                   | 1/0                               | 0/0  | -                  | 0 / 0   | 0 / 0       | 5/0                    | 17/0                   | 324/9                                                 |
| F   | 35         | Asian     | 52                     | 66                    | 8                 | 4/1                   | 3/0                               | 2/0  | -                  | 0 / 0   | 0 / 0       | 16/0                   | 31/1                   | 210/4                                                 |
| F   | 41         | Asian     | 19                     | 28                    | 8                 | 3/0                   | 1/0                               | 1/0  | -                  | 0 / 0   | 0 / 0       | 12/0                   | 21/2                   | 305/4                                                 |
| F   | 44         | Asian     | 22                     | 24                    | 8                 | 2/1                   | 1/0                               | 0/0  | -                  | 0 / 0   | 0 / 0       | 3/0                    | 15/1                   | 321/7                                                 |
| F   | 19         | Asian     | 67                     | 79                    | 8                 | 4/1                   | 4/0                               | 2/0  | -                  | 0 / 0   | 0 / 0       | 19/1                   | 20/1                   | 296/5                                                 |
| F   | 30         | Asian     | 43                     | 48                    | 8                 | 4/1                   | 3/0                               | 2/0  | -                  | 0 / 0   | 0 / 0       | 14/0                   | 20/2                   | 225/5                                                 |
| F   | 27         | Asian     | 21                     | 27                    | 8                 | 2/1                   | 1/0                               | 0/0  | -                  | 0 / 0   | 0 / 0       | 6/0                    | 13/1                   | 404/10                                                |
| F   | 22         | Asian     | 29                     | 41                    | 7                 | 3/1                   | 2/0                               | 1/0  | -                  | 0 / 0   | 0 / 0       | 19/1                   | 10/0                   | 342/9                                                 |
| F   | 45         | Asian     | 29                     | 35                    | 6                 | 3/1                   | 3/0                               | 2/0  | -                  | 0 / 0   | 0 / 0       | 13/0                   | 15/0                   | 347/4                                                 |
| F   | 28         | Asian     | 37                     | 52                    | 5                 | 3/1                   | 3/0                               | 2/0  | -                  | 0 / 0   | 0 / 0       | 20/1                   | 17/0                   | 300/3                                                 |
| F   | 19         | Asian     | 17                     | 5                     | 5                 | 2/1                   | 3/0                               | 0/0  | -                  | 0 / 0   | 0 / 0       | 7/0                    | 18/0                   | 240/4                                                 |
| F   | 26         | Asian     | 24                     | 29                    | 4                 | 3/1                   | 3/0                               | 1/0  | -                  | 0 / 0   | 0 / 0       | 15/1                   | 18/0                   | 226/3                                                 |
| F   | 42         | Asian     | 20                     | 26                    | 3                 | 3/1                   | 2/0                               | 2/0  | -                  | 0 / 0   | 0 / 0       | 15/0                   | 16/0                   | 304/7                                                 |



|   |    |       |    |    |   |     |     |     |     |       |       |      |      |        |
|---|----|-------|----|----|---|-----|-----|-----|-----|-------|-------|------|------|--------|
| F | 50 | Asian | 25 | 37 | 3 | 2/0 | 0/0 | 0/0 | -   | 0 / 0 | 0 / 0 | 4/0  | 7/0  | 333/7  |
| F | 35 | Asian | 56 | 65 | 2 | 3/0 | 3/0 | 1/0 | -   | 0 / 0 | 0 / 0 | 14/0 | 18/2 | 281/8  |
| F | 22 | Asian | 40 | 60 | 2 | 3/1 | 2/0 | 1/0 | -   | 0 / 0 | 0 / 0 | 15/0 | 20/1 | 238/11 |
| M | 41 | Asian | 38 | 45 | 8 | 3/1 | 4/0 | 0/0 | 3/0 | 0 / 0 | 0 / 0 | 17/1 | 24/1 | 252/18 |
| M | 33 | Asian | 36 | 42 | 8 | 3/0 | 2/0 | 0/0 | 1/0 | 0 / 0 | 0 / 0 | 13/0 | 22/3 | 205/4  |
| M | 27 | Asian | 10 | 12 | 8 | 2/0 | 2/0 | 0/0 | 0/0 | 0 / 0 | 0 / 0 | 5/0  | 14/0 | 317/8  |
| M | 40 | Asian | 48 | 60 | 5 | 4/1 | 3/0 | 0/0 | 3/0 | 0 / 0 | 0 / 0 | 17/0 | 27/3 | 321/12 |
| M | 24 | Asian | 35 | 50 | 3 | 3/1 | 1/0 | 0/0 | 1/0 | 0 / 0 | 0 / 0 | 10/0 | 18/0 | 270/6  |
| M | 35 | Asian | 42 | 50 | 2 | 3/0 | 1/0 | 0/0 | 1/0 | 0 / 0 | 0 / 0 | 12/0 | 17/0 | 289/6  |

Abbreviations: F, female; M, male; IGA: Investigator's Global Assessment; DLQI: Dermatology Life Quality Index; VQLI: Vulvar Quality of Life Index (modified for both genders); RCM: Reflectance Confocal Microscopy.

\*RCM examination was performed within a field of 2.5×2.5mm to assess the inflammatory cells count at the level of superficial dermi

**Supplementary Table 5. Laboratory parameters during baricitinib treatment**

|                                   | Baseline (n=26) | Week 24 (n=26) | P-value |
|-----------------------------------|-----------------|----------------|---------|
| <b>Complete blood count</b>       |                 |                |         |
| WBC (10 <sup>9</sup> /L)          | 6.89±1.78       | 7.13±1.44      | 0.5247  |
| PLT (10 <sup>9</sup> /L)          | 252.43±63.04    | 247.14±67.02   | 0.7132  |
| ANC (10 <sup>9</sup> /L)          | 3.95±1.40       | 4.2±1.09       | 0.4008  |
| ALC (10 <sup>9</sup> /L)          | 2.13±0.54       | 2.11±0.55      | 0.8937  |
| Hgb (g/L)                         | 140.57±7.72     | 142.71±9.50    | 0.5302  |
| <b>Biochemical tests</b>          |                 |                |         |
| ALB (g/L)                         | 44.83±2.28      | 46.57±2.52     | 0.1329  |
| ALT (U/L)                         | 20.71±8.83      | 15.43±3.66     | 0.2828  |
| AST (U/L)                         | 20.71±7.21      | 18.14±2.85     | 0.4021  |
| Cr (μmol/L)                       | 61.7±8.33       | 66.04±14.44    | 0.2877  |
| TC (mmol/L)                       | 4.62±0.58       | 4.76±0.47      | 0.6385  |
| TG (mmol/L)                       | 1.17±0.35       | 1.26±0.46      | 0.6424  |
| HLD (mmol/L)                      | 1.67±0.35       | 1.63±0.35      | 0.669   |
| LDL (mmol/L)                      | 2.83±0.49       | 2.91±0.35      | 0.765   |
| VLDL (mmol/L)                     | 0.58±0.15       | 0.57±0.22      | 0.8897  |
| GFR (ml/min)                      | 108.28±14.09    | 104.3±13       | 0.3529  |
| <b>Coagulation function tests</b> |                 |                |         |
| PT (s)                            | 11.69±1.16      | 11.53±0.86     | 0.7755  |
| PT-INR                            | 0.98±0.08       | 0.99±0.06      | 0.9193  |
| APTT (s)                          | 30.6±5.49       | 30.49±3.25     | 0.9527  |
| Fg (g/L)                          | 2.72±0.51       | 2.54±0.42      | 0.2597  |
| TT (s)                            | 17.51±0.99      | 17.77±1.03     | 0.6036  |
| <b>Inflammatory markers</b>       |                 |                |         |
| ESR (mm/h)                        | 15.68±1.94      | 15.39±2.09     | 0.8198  |
| CRP (mg/L)                        | 5.63±0.83       | 5.35±0.85      | 0.1518  |

**Data are mean ± standard deviation. The P-values were calculated by t-test.** WBC: white blood cells; PLT: platelet; ANC: absolute neutrophil count; ALC: absolute lymphocyte count; Hgb: hemoglobin; ALB: albumin; ALT: alanine aminotransferase; AST: aspartate transaminase; Cr: creatinine; TC: total cholesterol; TG: triglyceride; HLD: high density lipoproteins; LDL: low density lipoproteins; VLDL: very low density lipoproteins; GFR: glomerular filtration rate; PT: prothrombin time; PT-INR: prothrombin time-international normalization ratio; APTT: activated partial thromboplastin time; Fg: fibrinogen; TT: thrombin time; ESR: erythrocyte sedimentation rate; CRP: C-reactive protein.
